# Supplementary material for: Urbanization of Scrub Typhus Disease in South Korea
Source: PubMed Central journal article supplement (PMC4441427; doi:10.1371/journal.pntd.0003814), 2015-05-22
Supplement: pntd.0003814.s001.pdf [file pntd.0003814.s001.pdf]

S1 Table. Reported cases of National Infectious Diseases, 2001-2012

| Group                                | Diseases                              | No. of reported cases |        |        |        |        |        |        |        |         |        |        |        |       |
|--------------------------------------|---------------------------------------|-----------------------|--------|--------|--------|--------|--------|--------|--------|---------|--------|--------|--------|-------|
|                                      |                                       | 2001                  | 2002   | 2003   | 2004   | 2005   | 2006   | 2007   | 2008   | 2009    | 2010   | 2011   | 2012   |       |
| I                                    | Cholera                               | 162                   | 4      | 1      | 10     | 16     | 5      | 7      | 5      | 0       | 8      | 3      | 0      |       |
|                                      | Typhoid fever                         | 401                   | 221    | 199    | 174    | 190    | 200    | 223    | 188    | 168     | 133    | 148    | 129    |       |
|                                      | Paratyphoid fever                     | 36                    | 413    | 88     | 45     | 31     | 50     | 45     | 44     | 36      | 55     | 56     | 58     |       |
|                                      | Shigellosis                           | 927                   | 767    | 1,117  | 487    | 317    | 389    | 131    | 209    | 180     | 228    | 171    | 90     |       |
|                                      | Enterohemorrhagic <i>E. coli</i>      | 11                    | 8      | 52     | 118    | 43     | 37     | 41     | 58     | 62      | 56     | 71     | 58     |       |
|                                      | Viral hepatitis A                     | -                     | -      | -      | -      | -      | -      | -      | -      | -       | -      | 5,521  | 1,197  |       |
| II                                   | Pertussis                             | 9                     | 21     | 5      | 6      | 11     | 17     | 14     | 9      | 66      | 27     | 97     | 230    |       |
|                                      | Tetanus                               | 8                     | 4      | 8      | 11     | 11     | 10     | 8      | 16     | 17      | 14     | 19     | 17     |       |
|                                      | Measles                               | 23,060                | 62     | 33     | 11     | 7      | 28     | 194    | 2      | 17      | 114    | 42     | 3      |       |
|                                      | Mumps                                 | 1,668                 | 764    | 1,518  | 1,744  | 1,863  | 2,089  | 4,557  | 4,542  | 6,399   | 6,094  | 6,137  | 7,492  |       |
|                                      | Rubella                               | 128                   | 24     | 8      | 15     | 12     | 18     | 35     | 30     | 36      | 43     | 53     | 28     |       |
|                                      | Viral hepatitis B                     | Acute                 | -      | -      | -      | -      | -      | -      | -      | -       | -      | -      | 462    | 303   |
|                                      |                                       | HBsAg(+) maternity    | -      | -      | -      | -      | -      | -      | -      | -       | -      | -      | 936    | 2,438 |
|                                      |                                       | Perinatal             | -      | -      | -      | -      | -      | -      | -      | -       | -      | -      | 30     | 26    |
|                                      | Japanese encephalitis                 | 1                     | 6      | 1      | 0      | 6      | 0      | 7      | 6      | 6       | 26     | 3      | 20     |       |
|                                      | Varicella                             | -                     | -      | -      | -      | 1,934  | 11,027 | 20,284 | 22,849 | 25,197  | 24,400 | 36,249 | 27,763 |       |
| III                                  | Malaria                               | 2,556                 | 1,799  | 1,171  | 864    | 1,369  | 2,051  | 2,227  | 1,052  | 1,345   | 1,772  | 838    | 555    |       |
|                                      | Tuberculosis                          | 34,123                | 32,010 | 30,687 | 31,503 | 35,269 | 35,361 | 34,710 | 34,157 | 35,845  | 36,305 | 39,557 | 39,545 |       |
|                                      | Hansen's disease                      | 79                    | 64     | 41     | 43     | 38     | 56     | 12     | 7      | 5       | 6      | 7      | 5      |       |
|                                      | Scarlet fever                         | 49                    | 54     | 107    | 80     | 87     | 108    | 146    | 151    | 127     | 106    | 406    | 968    |       |
|                                      | Meningococcal meningitis              | 11                    | 27     | 38     | 8      | 7      | 11     | 4      | 1      | 3       | 12     | 7      | 4      |       |
|                                      | Legionellosis                         | 2                     | 1      | 3      | 10     | 6      | 20     | 19     | 21     | 24      | 30     | 28     | 25     |       |
|                                      | <i>Vibrio vulnificus</i> sepsis       | 41                    | 60     | 80     | 57     | 57     | 88     | 59     | 49     | 24      | 73     | 51     | 65     |       |
|                                      | Murine typhus                         | 16                    | 9      | 9      | 19     | 35     | 73     | 61     | 87     | 29      | 54     | 23     | 41     |       |
|                                      | Scrub typhus                          | 2,637                 | 1,919  | 1,415  | 4,698  | 6,780  | 6,480  | 6,022  | 6,057  | 4,995   | 5,671  | 5,151  | 8,604  |       |
|                                      | Leptospirosis                         | 133                   | 122    | 119    | 141    | 83     | 119    | 208    | 100    | 62      | 66     | 49     | 28     |       |
|                                      | Brucellosis                           | 0                     | 1      | 16     | 47     | 158    | 215    | 101    | 58     | 24      | 31     | 19     | 17     |       |
|                                      | Rabies                                | 1                     | 1      | 2      | 1      | 0      | 0      | 0      | 0      | 0       | 0      | 0      | 0      |       |
|                                      | Hemorrhagic Fever with Renal Syndrome | 323                   | 336    | 392    | 427    | 421    | 422    | 450    | 375    | 334     | 473    | 370    | 364    |       |
|                                      | AIDS (and HIV infection)              | 327                   | 397    | 533    | 610    | 680    | 749    | 740    | 797    | 768     | 773    | 888    | 868    |       |
|                                      | Syphilis                              | Primary               | -      | -      | -      | -      | -      | -      | -      | -       | -      | -      | 690    | 562   |
|                                      |                                       | Secondary             | -      | -      | -      | -      | -      | -      | -      | -       | -      | -      | 235    | 199   |
|                                      |                                       | Congenital            | -      | -      | -      | -      | -      | -      | -      | -       | -      | -      | 40     | 26    |
|                                      | Creutzfeldt-Jacob disease (CJD)       | -                     | -      | -      | -      | -      | -      | -      | -      | -       | -      | 29     | 45     |       |
|                                      | IV                                    | Dengue fever          | 6      | 9      | 14     | 16     | 34     | 35     | 97     | 51      | 59     | 125    | 72     | 149   |
| Botulism                             |                                       | -                     | 0      | 3      | 4      | 0      | 1      | 0      | 0      | 1       | 0      | 1      | 0      |       |
| Q fever                              |                                       | -                     | -      | -      | -      | -      | 6      | 12     | 19     | 14      | 13     | 8      | 10     |       |
| West Nile fever                      |                                       | -                     | -      | -      | -      | -      | -      | -      | -      | -       | -      | 0      | 1      |       |
| Emerging infectious disease syndrome |                                       | 0                     | 0      | 0      | 0      | 0      | 0      | 0      | 0      | 706,911 | 56,850 | 0      | 0      |       |
| Lyme Borreliosis                     |                                       | -                     | -      | -      | -      | -      | -      | -      | -      | -       | -      | 2      | 3      |       |
| Melioidosis                          |                                       | -                     | -      | -      | -      | -      | -      | -      | -      | -       | -      | 1      | 0      |       |
| Leishmaniasis                        |                                       | 0                     | 1      | 0      | 1      | 0      | 0      | 0      | 0      | 0       | 1      | -      | -      |       |
| Babesiosis                           |                                       | 0                     | 0      | 0      | 0      | 1      | 0      | 0      | 0      | 0       | 0      | -      | -      |       |
| Cryptosporidiosis                    |                                       | 0                     | 0      | 0      | 0      | 1      | 0      | 0      | 0      | 0       | 0      | -      | -      |       |
| Schistosomiasis                      |                                       | 0                     | 0      | 0      | 0      | 0      | 0      | 2      | 1      | 0       | 0      | -      | -      |       |

1) Excludes Infectious diseases for Sentinel Surveillance System.

2) No. of notifications contains all case classifications of the disease(Confirmed, Suspected, Asymptomatic carrier) respectively.

3) The Viral hepatitis A, Viral hepatitis B, Syphilis and Creutzfeldt-jacob disease, West Nile fever were newly categorized to mandatory surveillance from sentinel surveillance by revision of "the Infectious Disease Prevention and Control Act" in 2010.

4) The Leishmaniasis, Babesiosis, Cryptosporidiosis and Schistosomiasis were newly categorized to sentinel surveillance from mandatory surveillance by revision of "the Infectious Disease Prevention and Control Act" in 2010.

5) No cases of Diphtheria, Poliomyelitis, Epidemic typhus, Anthrax, Plague, Yellow fever, Viral hemorrhagic fever(Marburg virus, Ebola virus, Lassa virus etc), Smallpox, Severe Acute Respiratory Syndrome(SARS), Avian influenza infection in humans, Novel influenza, Tularemia, Tick-borne Encephalitis, Chikungunya fever were notified during 2001-2012.

6) 0: No notified cases, -: Not notifiable.

7) Emerging infectious disease syndrome of 2009, 2010 is influenza A(H1N1)pdm09.
