# Supplementary material for: Urbanization of Scrub Typhus Disease in South Korea
Source: PubMed Central journal article supplement (PMC4441427; doi:10.1371/journal.pntd.0003814), 2015-05-22
Supplement: pntd.0003814.s003.pdf [file pntd.0003814.s003.pdf]

**S3 Table.** Identification of mites and *Orientia tsutsugamushi*

| Date collected | ID  | Morphological ID    | Genetic ID (18S rDNA)* | <i>O. tsutsugamushi</i> (tsa56)* |
|----------------|-----|---------------------|------------------------|----------------------------------|
| Oct.28.2013    | H1  | <i>H. miyagawai</i> | -                      | +                                |
| Oct.28.2013    | H2  | <i>H. miyagawai</i> | +                      |                                  |
| Oct.28.2013    | H3  | <i>H. miyagawai</i> | -                      |                                  |
| Oct.28.2013    | H4  | <i>H. miyagawai</i> | -                      |                                  |
| Oct.28.2013    | H5  | <i>H. miyagawai</i> | +                      |                                  |
| Oct.28.2013    | H6  | <i>H. miyagawai</i> | -                      |                                  |
| Oct.28.2013    | H7  | <i>H. miyagawai</i> | +                      |                                  |
| Oct.28.2013    | H8  | <i>H. miyagawai</i> | -                      |                                  |
| Oct.28.2013    | H9  | <i>H. miyagawai</i> | -                      |                                  |
| Oct.28.2013    | H10 | <i>H. miyagawai</i> | +                      |                                  |
| Oct.28.2013    | H11 | <i>H. miyagawai</i> | -                      | -                                |
| Oct.28.2013    | H12 | <i>H. miyagawai</i> | +                      |                                  |
| Oct.28.2013    | H13 | <i>H. miyagawai</i> | +                      |                                  |
| Oct.28.2013    | H14 | <i>H. miyagawai</i> | +                      |                                  |
| Nov.05.2013    | H15 | <i>H. miyagawai</i> | -                      |                                  |
| Nov.05.2013    | H16 | <i>H. miyagawai</i> | -                      |                                  |
| Nov.05.2013    | H17 | <i>H. miyagawai</i> | -                      |                                  |
| Nov.05.2013    | H18 | <i>H. miyagawai</i> | -                      |                                  |
| Nov.05.2013    | H19 | <i>H. miyagawai</i> | -                      |                                  |
| Nov.05.2013    | H20 | <i>H. miyagawai</i> | +                      |                                  |
| Nov.05.2013    | H21 | <i>H. miyagawai</i> | -                      | -                                |
| Nov.05.2013    | H22 | <i>H. miyagawai</i> | -                      |                                  |
| Nov.05.2013    | H23 | <i>H. miyagawai</i> | +                      |                                  |
| Nov.05.2013    | H24 | <i>H. miyagawai</i> | +                      |                                  |
| Nov.05.2013    | H25 | <i>H. miyagawai</i> | +                      |                                  |
| Nov.05.2013    | H26 | <i>H. miyagawai</i> | -                      |                                  |
| Nov.05.2013    | H27 | <i>H. miyagawai</i> | +                      |                                  |
| Nov.05.2013    | H28 | <i>H. miyagawai</i> | -                      |                                  |
| Nov.05.2013    | H29 | <i>H. miyagawai</i> | +                      |                                  |
| Nov.05.2013    | H30 | <i>H. miyagawai</i> | +                      |                                  |
| Nov.05.2013    | H31 | <i>H. miyagawai</i> | -                      | -                                |
| Nov.05.2013    | H32 | <i>H. miyagawai</i> | -                      |                                  |
| Nov.05.2013    | H33 | <i>H. miyagawai</i> | +                      |                                  |
| Nov.05.2013    | H34 | <i>H. miyagawai</i> | +                      |                                  |
| Nov.05.2013    | H35 | <i>H. miyagawai</i> | -                      |                                  |
| Nov.05.2013    | H36 | <i>H. miyagawai</i> | +                      |                                  |
| Nov.05.2013    | H37 | <i>H. miyagawai</i> | -                      |                                  |
| Nov.05.2013    | H38 | <i>H. miyagawai</i> | -                      |                                  |
| Nov.05.2013    | H39 | <i>H. miyagawai</i> | -                      |                                  |
| Nov.12.2013    | H40 | <i>H. miyagawai</i> | +                      |                                  |
| Nov.12.2013    | H41 | <i>H. miyagawai</i> | +                      | -                                |
| Nov.12.2013    | H42 | <i>H. miyagawai</i> | +                      |                                  |
| Nov.12.2013    | H43 | <i>H. miyagawai</i> | -                      |                                  |
| Nov.12.2013    | H44 | <i>H. miyagawai</i> | +                      |                                  |
| Nov.12.2013    | H45 | <i>H. miyagawai</i> | -                      |                                  |
| Nov.19.2013    | H46 | <i>H. miyagawai</i> | +                      |                                  |
| Nov.19.2013    | H47 | <i>H. miyagawai</i> | -                      |                                  |
| Nov.19.2013    | H48 | <i>H. miyagawai</i> | -                      |                                  |

|             |     |                      |   |   |
|-------------|-----|----------------------|---|---|
| Nov.19.2013 | H49 | <i>H. miyagawai</i>  | - |   |
| Nov.19.2013 | H50 | <i>H. miyagawai</i>  | - |   |
| Nov.19.2013 | H51 | <i>H. miyagawai</i>  | + | + |
| Nov.19.2013 | H52 | <i>H. miyagawai</i>  | + |   |
| Nov.19.2013 | H53 | <i>H. miyagawai</i>  | + |   |
| Nov.19.2013 | H54 | <i>H. miyagawai</i>  | + |   |
| Nov.19.2013 | H55 | <i>H. miyagawai</i>  | - |   |
| Nov.19.2013 | H56 | <i>H. miyagawai</i>  | - |   |
| Nov.19.2013 | H57 | <i>H. miyagawai</i>  | - |   |
| Nov.19.2013 | H58 | <i>H. miyagawai</i>  | - |   |
| Nov.19.2013 | H59 | <i>H. miyagawai</i>  | - |   |
| Nov.19.2013 | H60 | <i>H. miyagawai</i>  | - |   |
| Nov.19.2013 | H61 | <i>H. miyagawai</i>  | + | - |
| Nov.19.2013 | H62 | <i>H. miyagawai</i>  | + |   |
| Nov.19.2013 | H63 | <i>H. miyagawai</i>  | - |   |
| Nov.19.2013 | H64 | <i>H. miyagawai</i>  | - |   |
| Nov.19.2013 | H65 | <i>H. miyagawai</i>  | - |   |
| Nov.19.2013 | H66 | <i>H. miyagawai</i>  | + |   |
| Nov.19.2013 | H67 | <i>H. miyagawai</i>  | + |   |
| Nov.19.2013 | H68 | <i>H. miyagawai</i>  | + |   |
| Nov.19.2013 | H69 | <i>H. miyagawai</i>  | - |   |
| Nov.26.2013 | H70 | <i>H. miyagawai</i>  | + |   |
| Nov.26.2013 | H71 | <i>H. miyagawai</i>  | + | - |
| Nov.26.2013 | H72 | <i>H. miyagawai</i>  | + |   |
| Nov.26.2013 | H73 | <i>H. miyagawai</i>  | + |   |
| Nov.26.2013 | H74 | <i>H. miyagawai</i>  | + |   |
| Nov.26.2013 | H75 | <i>H. miyagawai</i>  | + |   |
| Nov.26.2013 | H76 | <i>H. miyagawai</i>  | + |   |
| Oct.18.2013 | L1  | <i>L. scutellare</i> | + | - |
| Oct.22.2013 | L2  | <i>L. scutellare</i> | + |   |
| Oct.22.2013 | L3  | <i>L. scutellare</i> | + |   |
| Oct.22.2013 | L4  | <i>L. scutellare</i> | + |   |
| Oct.22.2013 | L5  | <i>L. scutellare</i> | + |   |
| Oct.28.2013 | L6  | <i>L. scutellare</i> | + |   |
| Oct.28.2013 | L7  | <i>L. scutellare</i> | + |   |
| Nov.05.2013 | L8  | <i>L. scutellare</i> | - |   |
| Nov.12.2013 | L10 | <i>L. palpale</i>    | - | - |
| Nov.05.2013 | L9  | <i>L. zetum</i>      | - | - |
| Nov.12.2013 | L11 | <i>L. zetum</i>      | - |   |

\*(+), PCR-positive; (-), PCR-negative

# ID, identification;
